# Supplementary material for: Rad52-Rad51 association is essential to protect Rad51 filaments against Srs2, but facultative for filament formation
Source: eLife journal article supplement (doi:10.7554/elife.32744), 2018-07-09
Supplement: supp [file elife-32744-supp-v1.zip]

Archive with 16 entries (16 files):
- elife_poa_e32744_Figure_4_figure_supplement_1.pdf
- elife_poa_e32744_Figure_4_figure_supplement_1_source_data_1.xlsx
- elife_poa_e32744_Figure_3_source_data_1.xlsx
- elife_poa_e32744_Figure_5_figure_supplement_1.pdf
- elife_poa_e32744_Figure_5_source_data_1.xlsx
- elife_poa_e32744_Figure_5_figure_supplement_3.pdf
- elife_poa_e32744_Figure_1_figure_supplement_2.pdf
- elife_poa_e32744_Figure_4_source_data_1.xlsx
- elife_poa_e32744_Figure_5_figure_supplement_3_source_data_1.xlsx
- elife_poa_e32744_Figure_5_figure_supplement_1_source_data_1.xlsx
- elife_poa_e32744_Supplementary_File_1.docx
- elife_poa_e32744_Figure_2_source_data_1.xlsx
- elife_poa_e32744_Figure_1_source_data_1.xlsx
- elife_poa_e32744_Figure_1_figure_supplement_1.pdf
- elife_poa_e32744_Figure_5_figure_supplement_2.pdf
- elife_poa_e32744_Supplementary_File_2.docx
