# Supplementary material for: Rad52-Rad51 association is essential to protect Rad51 filaments against Srs2, but facultative for filament formation
Source: eLife journal article supplement (doi:10.7554/elife.32744), 2018-07-09
Supplement: supp [file elife-32744-supp-v1.zip › elife_poa_e32744_Figure_1_figure_supplement_1.pdf]

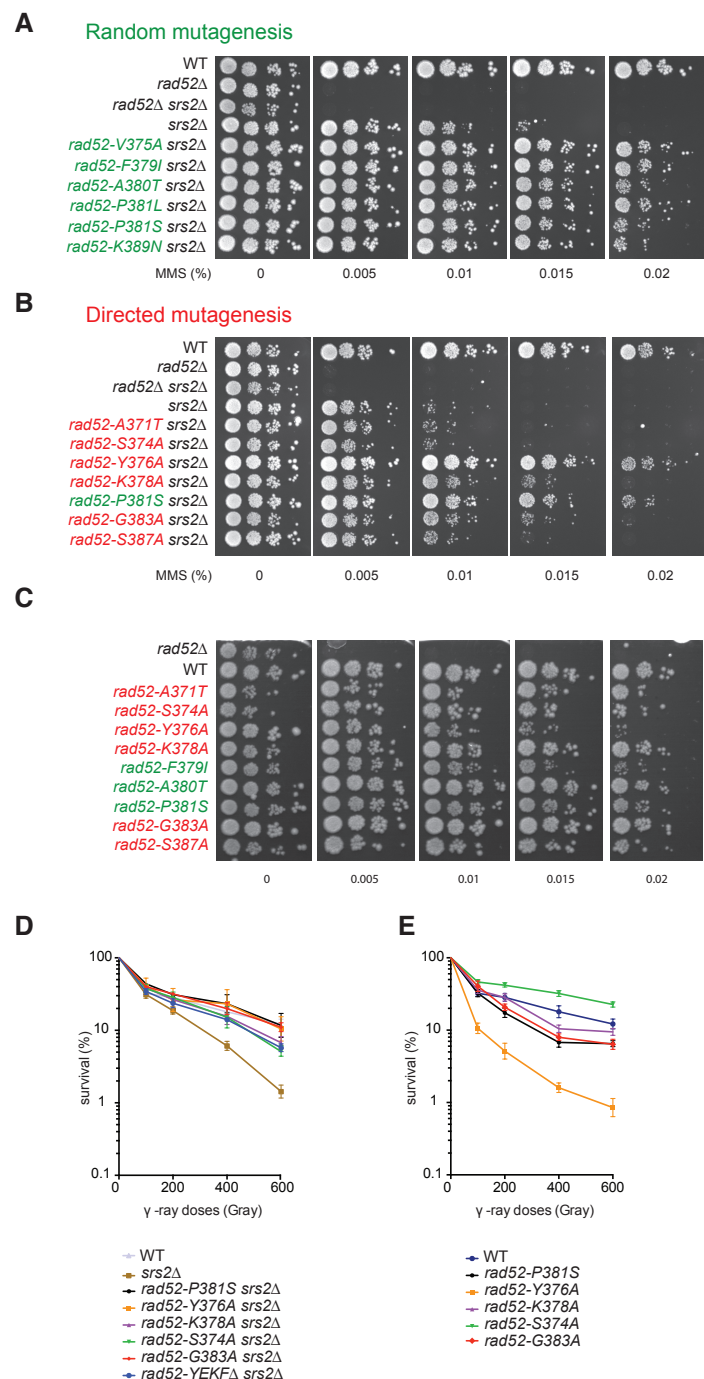

**Figure1-figure supplement 1.** Mutations in the Rad51-binding domain of Rad52 suppress MMS and  $\gamma$ -ray sensitivity of Srs2-deficient cells. (A,B,C) Serial 10-fold dilutions of haploid strains that were isolated by random mutation screening (green) or that harbor Rad52 mutations created by directed mutagenesis (red). The tested strains are derivative of *rad52Δ* or *rad52Δ srs2Δ* null mutants transformed with empty Ycplac111 centromeric plasmid or with wild type or mutated versions of *RAD52*. (D,E) Survival curves of haploid cells bearing mutations from our collection. Cells were in the log phase of growth when exposed to  $\gamma$ -rays. Data are presented as the mean  $\pm$  SEM of at least 3 independent experiments. The *rad52-A371T*, *rad52-S374A* and *rad52-S387A* mutations cannot restore MMS resistance in Srs2-deficient cells, but they can reduce  $\gamma$ -ray sensitivity of Srs2-deficient cells. This difference could be explained by the constant formation of lesions in cells growing in MMS-containing plates, while exposure to  $\gamma$ -rays for a limited period of time creates only a definite number of lesions.
