# Supplementary material for: Rad52-Rad51 association is essential to protect Rad51 filaments against Srs2, but facultative for filament formation
Source: eLife journal article supplement (doi:10.7554/elife.32744), 2018-07-09
Supplement: supp [file elife-32744-supp-v1.zip › elife_poa_e32744_Figure_1_figure_supplement_2.pdf]

**A***rad52-P381S srs2Δ* x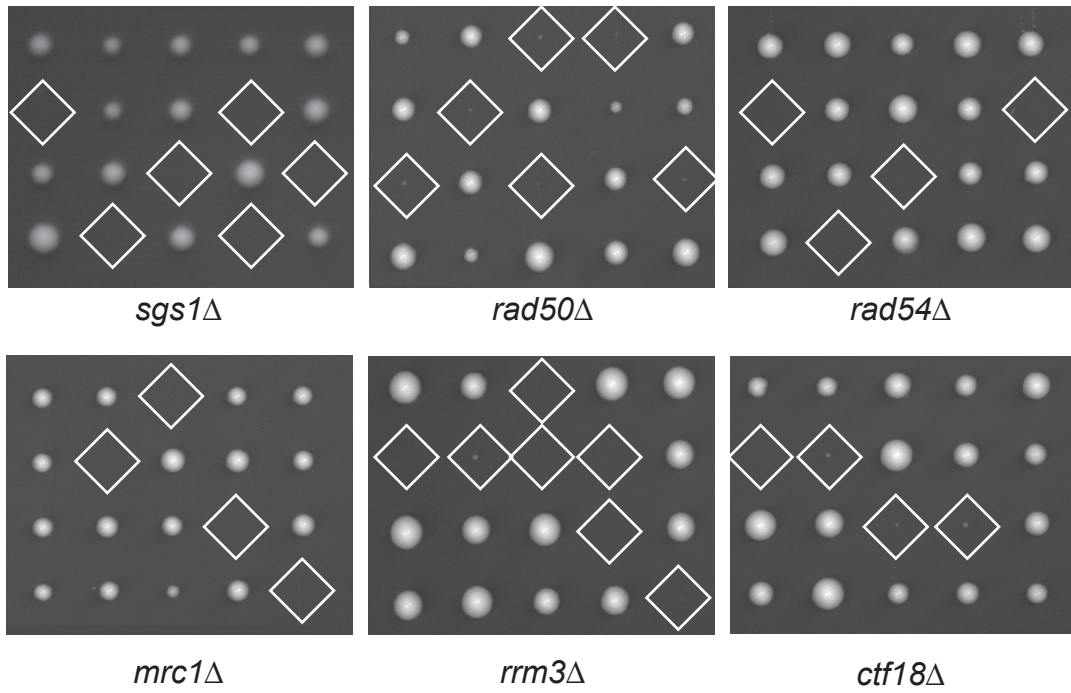**B***rad52-Y376A srs2Δ* x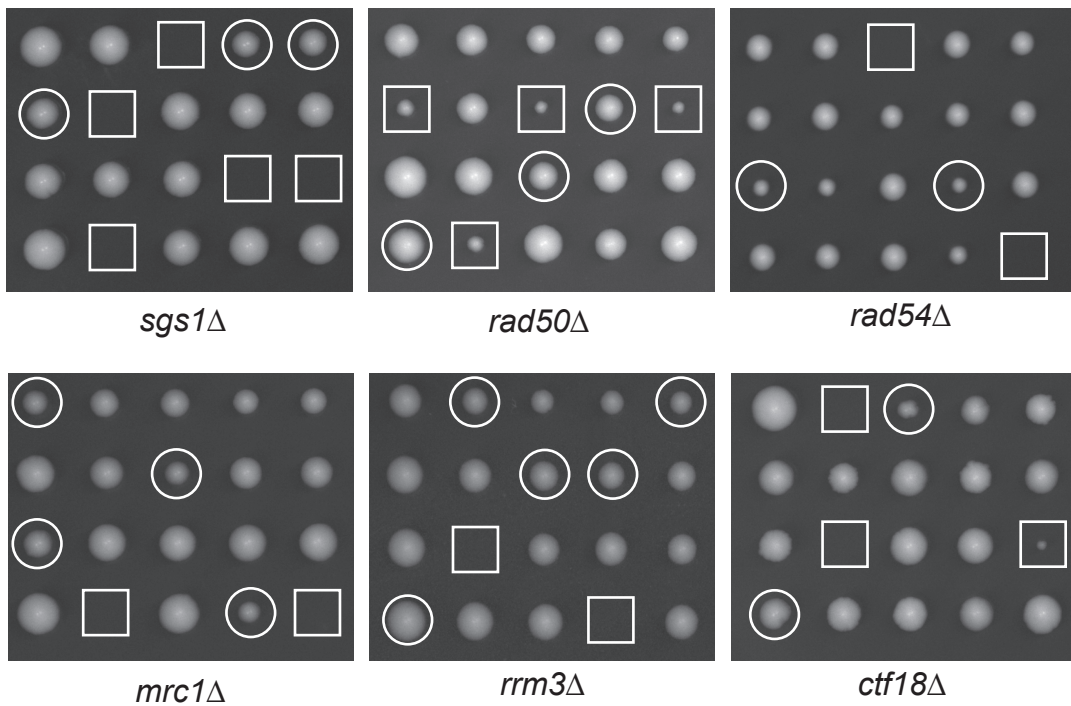

**Figure1-figure supplement 2.** The *rad52-Y376A*, but not the *rad52-P381S* mutation suppresses the effect of mutations that are synthetically lethal with *srs2Δ*. (A) Tetrad analysis of crosses between haploid *rad52-P381S srs2Δ* strains and haploid mutants that are synthetically lethal with *srs2Δ*. White diamonds indicate synthetic lethal combinations with or without *rad52-P381S*. This mutation does not affect the interaction between Rad52 and Rad51 enough to suppress the synthetic lethality. (B) Same crosses as in (A) but with *rad52-Y376A*. Double mutant spores, which do not contain *rad52-Y376A*, are indicated by white squares. The white circles mark viable triple mutants.
