# Supplementary material for: Rad52-Rad51 association is essential to protect Rad51 filaments against Srs2, but facultative for filament formation
Source: eLife journal article supplement (doi:10.7554/elife.32744), 2018-07-09
Supplement: supp [file elife-32744-supp-v1.zip › elife_poa_e32744_Figure_1_source_data_1.xlsx]

## Sheet: Fig. 1
Source data Figure 1
Survival (%) of haploid cells exposed to γ-ray
Figure 1D		WT (FF)					srs2∆				rad52-P381S srs2∆				rad52-Y376A srs2∆
	Biological replicate	1	2	3	4		1	2	3		1	2	3		1	2	3
	g-ray doses (Gray)
	0	100	100	100	100		100	100	100		100	100	100		100	100	100
	100	34.3	35.3	36.7	22.9		36	34	23.5		42.6	45	43.6		28.9	52.5	38
	200	32.6	25	28.4	27.5		21	18	17		29.6	32.5	36		14.7	37.8	30.5
	400	16.5	16.3	28.3	10.7		8	5	5.3		15.4	31	18.4		10	36.4	22.7
	600	11.4	9.4	18.2	9.7		1.5	1.5	1.3		6.3	17.1	6.4		5.5	15.4	8.2
Figure 1E		rad52-P381S					rad52-Y376A
		1	2	3	4		1	2	3
	g-ray doses (Gray)
	0	100	100	100	100		100	100	100
	100	39	25.5	32.9			12.5	8.7
	200	25.4	14	16.3	13.6		7.8	4.8	2.8
	400	8.1	4.3	5.6	9.1		1.5	2.1	1.2
	600	6.3	4.8	7.1	7.8		1.25	1	0.3
Figure 1F		WT (W303)					rad52-YEKF∆ (FF)						rad52-YEKF∆ (W303)
		1	2	3	4		1	2	3	4	5		1	2	3	4
	g-ray doses (Gray)
	0	100	100	100	100		100	100	100	100	100		100	100	100	100
	100	43.1	28	45.8	44		11.1	19.4	18	13.9	23.3		31.4	13.9	25.3	16.3
	200	37.3	28	40.8	40.6		5.6	7.7	14.2	7.7	7.9		15.9	16.5	9.9	8.1
	400	17.1	22.9	32.3	32.1		0.7	1.9	9.3	2.9	4.2		3.5	10.6	4.9	3.8
	600	17.1	13.9	23.7	24.6		0.5	2.9	3.3	1.1	1.1			5.3	2.3	1.4
		rad52∆ (FF)					rad52∆ (W303)
		1	2	3			1	2	3	4
	g-ray doses (Gray)
	0	100	100	100			100	100	100	100
	100	1.7	1.9	1.4			2.9	1.3	3	3.5
	200	0.06	0.01	0.04				0.03	0.03
