# Supplementary material for: Rad52-Rad51 association is essential to protect Rad51 filaments against Srs2, but facultative for filament formation
Source: eLife journal article supplement (doi:10.7554/elife.32744), 2018-07-09
Supplement: supp [file elife-32744-supp-v1.zip › elife_poa_e32744_Figure_2_source_data_1.xlsx]

## Sheet: Feuil1
Source data Figure 2A
Relative IP (%)
Biological replicate	1	2	3
WT	100	100	100
YEKFΔ	0	0.255	0.46
S374A	73.35	67.154	59.2
Y376A	0	0.417	1.287
K378A	25.394	20.956	24.72
P381S	9.802	24.747	29.567
G383A	7.059	3.579	4.574
Two tailed P values, unpaired T test
T test	p value
WT vs YEKF∆	< 0.0001
WT vs S374A	0.0012
YEKF vs Y376A	0.4580
S374A vs K378A	0.0006
Y376A vs G383A	0.015
K378A vs P381S	0.723
P381S vs G383A	0.0541
