# Supplementary material for: Rad52-Rad51 association is essential to protect Rad51 filaments against Srs2, but facultative for filament formation
Source: eLife journal article supplement (doi:10.7554/elife.32744), 2018-07-09
Supplement: supp [file elife-32744-supp-v1.zip › elife_poa_e32744_Figure_3_source_data_1.xlsx]

## Sheet: Feuil1
Source data Figure 3																				Figure 3D								T test	p value
																												WT vs rad52-P381S	0.0323
Figure 3B		Strains	WT					rad52-P381S					rad52-Y376A							Biological replicate			1	2	3	4		WT vs rad52-Y376A	0.0229
	Biological replicate		1	2	3	4		1	2	3	4		1	2	3						Survival (%)							srs2∆ vs srs2∆ rad52-P381S	0.1552
	g-ray doses (Gray)																			WT			76	76.3	69			srs2∆ vs srs2∆ rad52-Y376A	0.0292
	0		100	100	100	100		100	100	100	100		100	100	100					rad52-P381S			65.3	64.8	70	66.4
	100		79	76.3	66.4	77		78.4	97.6		70.7		100	62.7	66.6					rad52-Y376A			68.6	56.6	55.9	51
Survival (%)	200		64.8	67.6	53	73.5		48.3	84	72	64		24.9	37.1	39.3					srs2∆			0.48	1	0.88
	400		48.3	56.8	38.5	54		31	48	39.2	34.8		8.8	7.9	5.9					srs2∆ rad52-P381S			2	1.3	4.9
	600		31.8	29.5	30.4	32.6		14.6	16.8	12.5	15.5		1.6	2	1.8					srs2∆ rad52-Y376A			6.9	6.9	15.8	19.6
	0		0	0	0	0		0	0	0	0		0	0	0
	100		215	415	162	234		140	222		188		42	24.6	23
Arg+ frequencies	200		218	670	228	311		175	414	231	226		243	57.3	55
(x10-6 survivors)	400		279	734	348	529		506	726	424	489		813	336	532
	600		334	1293	450	852		507	1214	933	751		2323	1340	1770
Figure 3C		Strains	srs2∆									rad52-P381S srs2Δ					rad52-Y376A srs2Δ
	Biological replicate		1	2	3	4	5	6	7	8		1	2	3	4		1	2	3
	g-ray doses (Gray)
	0		100	100	100	100	100	100	100	100		100	100	100	100		100	100	100
	100		14.3	6.9		3.6	2.5	2.3	1.1	9.1		12.1	18.5	24.4	35		48.8	57.3	100
Survival (%)	200			0.21	0.33	0.29	0.45	0.15	0.18	0.58		1.7	3	2.5	1.5		18.8	36.1	42
	400					0.0056	0.02	0.005	0.0028	0.033		0.08	0.13	0.36	0.21		7.6	10.2	9.6
	600					0.0106	0.0036			0.005		0.038	0.15	0.068	0.0875		1.8	3.5	5.4
	0		0	0	0	0	0	0	0	0		0	0	0	0		0	0	0
	100		1093	2106		8787	6132	5189		1548		1687	850	411	318		290	195	146
Arg+ frequencies	200		52126	51771	21066	37272	29621	58611		23810		5391	4840	3932	8000		778	311	626
(x10-6 survivors)	400											92300	46798	18000	39032		1126	787	1940
	600											132800	38924	62143	66024		4957	1906	1886
