# Supplementary material for: Rad52-Rad51 association is essential to protect Rad51 filaments against Srs2, but facultative for filament formation
Source: eLife journal article supplement (doi:10.7554/elife.32744), 2018-07-09
Supplement: supp [file elife-32744-supp-v1.zip › elife_poa_e32744_Figure_4_figure_supplement_1.pdf]

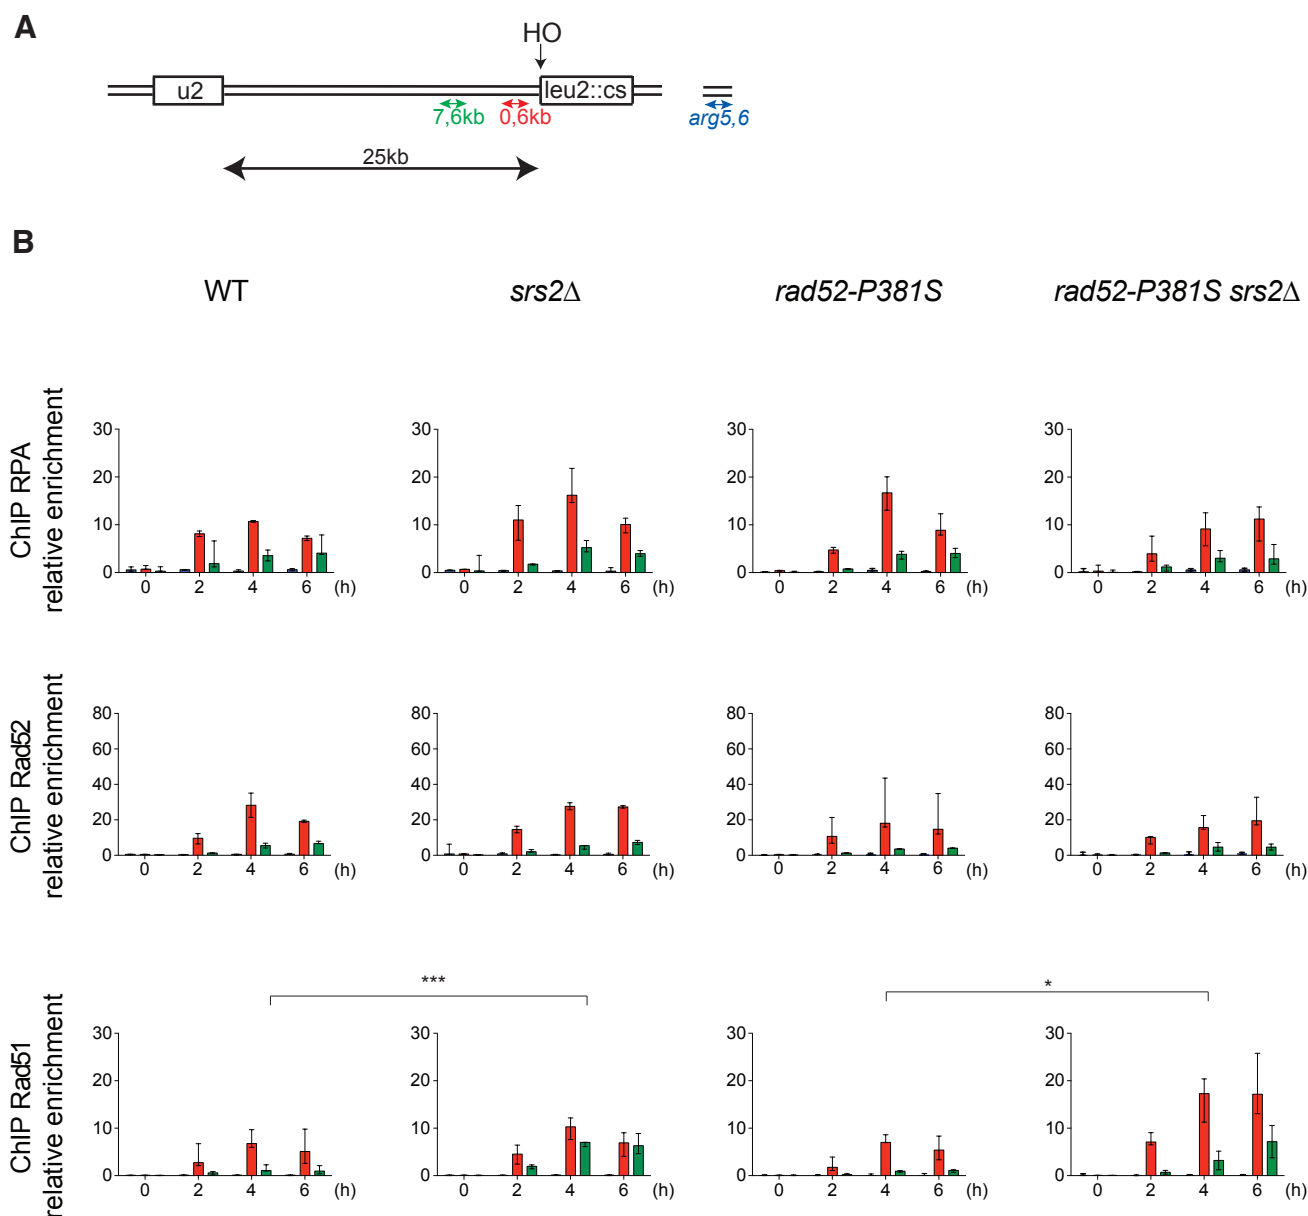

**Figure 4-figure supplement 1.** ChIP analysis of Rad51 filament formation in *rad52-P381S* mutant cells that lack or not Srs2. (A) Schematic representation of the HO-induced DSB repair system used. Breakage by HO can be repaired by single strand annealing (SSA) of two directed repeats located 25kb apart. (B) ChIP analysis after HO induction in wild type (WT) or Srs2-deficient cells that express WT or Rad52-P381S-FLAG proteins. The median value of at least 3 experiments is shown and error bars represent the upper and lower values. Fisher's exact test, \*  $p < 0.05$ , \*\*  $p < 0.01$ , \*\*\*  $p < 0.001$ . Statistical analysis was performed at the 4 h time point; only significant differences are shown. The *rad52-P381S* mutation did not significantly change Rad51 or Rad52 enrichment at 7.6kb (green) and 0.6kb (red) from the DSB, but a 1.5-fold significant increase in RPA recruitment was observed compared with WT Rad52. This increase could be related to an enrichment of ssDNA coated with both RPA and Rad51. This higher RPA enrichment is dependent on Srs2 because RPA loading is reduced by 1.8-fold in *rad52-P381S srs2*Δ cells compared with *rad52-P381S* cells. This is associated with a 2.5-fold increase in Rad51 loading at 0.6kb from the DSB site in *rad52-P381S srs2*Δ cells compared with *rad52-P381S* cells. This suggests that Srs2 removes significantly more Rad51 in *rad52-P381S* cells. Similarly, Rad51 loading at the 7.6kb site was increased by 3.4-fold in *rad52-P381S srs2*Δ cells compared with *rad52-P381S* cells. Therefore, Rad51 filaments assembled by Rad52-P381S are sensitive to Srs2 activity regardless of the distance from the break, confirming that Rad52 association with Rad51 protects Rad51 filaments from Srs2. Interestingly, the recruitment of Rad51 is increased specifically in *rad52-P381S srs2*Δ cells compared with *rad52-P381S* cells and *srs2*Δ cells for a reason we do not understand.
