# Supplementary material for: Rad52-Rad51 association is essential to protect Rad51 filaments against Srs2, but facultative for filament formation
Source: eLife journal article supplement (doi:10.7554/elife.32744), 2018-07-09
Supplement: supp [file elife-32744-supp-v1.zip › elife_poa_e32744_Figure_4_figure_supplement_1_source_data_1.xlsx]

## Sheet: Feuil1
				WT						Source data Figure 4A									srs2∆														rad52-P381S														rad52-P381S srs2∆
ChIP RPA (Ip/Input)															ChIP RPA (Ip/Input)															ChIP RPA (Ip/Input)													ChIP RPA (Ip/Input)
			Biological Replicate															Biological Replicate															Biological Replicate													Biological Replicate
ARG5,6	Time (h)	1	2	3	médiane	MAX	MIN								ARG5,6	Time (h)	1	2	3	médiane	MAX	MIN								ARG5,6	Time (h)	1	2	3	médiane	MAX	MIN						ARG5,6	Time (h)	1	2	3	médiane	MAX
	0	1.37967	0.572482	0.455399	0.572482	1.37967	0.455399									0	4.26332	0.565789	0.407407	0.565789	4.26332	0.407407									0	0.0959924	0.108273	0.110017	0.108273	0.110017	0.0959924							0	0.83046	0.0910506	0.182732	0.182732	0.83046
	2	5.50239	0.613508	0.635104	0.635104	5.50239	0.613508									2	0.235033	0.492891	0.409962	0.409962	0.492891	0.235033									2	0.196585	0.241379	0.18315	0.196585	0.241379	0.18315							2	0.220133	0.14662	0.157437	0.157437	0.220133
	4	0.227176	0.582589	0.325112	0.325112	0.582589	0.227176									4	3.39564	0.415179	0.323144	0.415179	3.39564	0.323144									4	0.47817	0.851153	0.356206	0.47817	0.851153	0.356206							4	0.55957	0.366397	0.851541	0.55957	0.851541
	6	0.613636	0.766839	0.326087	0.613636	0.766839	0.326087									6	0.198526	1.0315	0.300836	0.300836	1.0315	0.198526									6	0.207947	0.319632	0.226531	0.226531	0.319632	0.207947							6	0.0848765	0.290598	0.916981	0.290598	0.916981
			Biological Replicate															Biological Replicate															Biological Replicate													Biological Replicate
0.6kb	Time (h)	1	2	3	médiane	MAX	MIN								0.6kb	Time (h)	1	2	3	médiane	MAX	MIN								0.6kb	Time (h)	1	2	3	médiane	MAX	MIN						0.6kb	Time (h)	1	2	3	médiane	MAX
	0	1.4714	0.698113	0.713024	0.713024	1.4714	0.698113									0	5.02024	0.697289	0.672968	0.697289	5.02024	0.672968									0	0.297907	0.406308	0.484536	0.406308	0.484536	0.297907							0	1.5634	0.309198	0.188583	0.309198	1.5634
	2		7.53472	8.68687	8.1108	8.68687	7.53472									2	14.0373	11.0222	6.76056	11.0222	14.0373	6.76056									2	4.07216	4.73494	5.27907	4.73494	5.27907	4.07216							2	3.95455	7.64228	2.37592	3.95455	7.64228
	4		10.8291	10.5121	10.6706	10.8291	10.5121									4	21.8321	16.1939	14.6776	16.1939	21.8321	14.6776									4	13.0769	20.0568	16.6975	16.6975	20.0568	13.0769							4	5.61028	12.5276	9.13991	9.13991	12.5276
	6		7.6378	6.70455	7.17117	7.6378	6.70455									6	11.3889	10.0725	8.33333	10.0725	11.3889	8.33333									6	8.86719	12.3162	7.86207	8.86719	12.3162	7.86207							6	11.2112	13.7421	6.61321	11.2112	13.7421
			Biological Replicate															Biological Replicate															Biological Replicate													Biological Replicate
7.6kb	Time (h)	1	2	3	médiane	MAX	MIN								7.6kb	Time (h)	1	2	3	médiane	MAX	MIN								7.6kb	Time (h)	1	2	3	médiane	MAX	MIN						7.6kb	Time (h)	1	2	3	médiane	MAX
	0	1.207	0.278	0.29	0.29	1.207	0.278									0	3.62	0.357	0.293	0.357	3.62	0.293									0	0.0677686	0.0860417	0.297468	0.0860417	0.297468	0.0677686							0	0.52682	0.0620072	0.0710169	0.0710169	0.52682
	2	6.622	1.2	1.859	1.859	6.622	1.2									2	1.819	1.767	1.581	1.767	1.819	1.581									2	0.68232	0.760417	0.84273	0.760417	0.84273	0.68232							2	1.1902	1.57033	0.339958	1.1902	1.57033
	4	4.712	3.533	2.444	3.533	4.712	2.444									4	6.719	4.33	5.244	5.244	6.719	4.33									4	2.83784	4.47059	3.84756	3.84756	4.47059	2.83784							4	2.25549	4.61731	3.01538	3.01538	4.61731
	6	7.865	3.78	4.07	4.07	7.865	3.78									6	3.403	3.977	4.607	3.977	4.607	3.403									6	3.13525	5.07513	4.00673	4.00673	5.07513	3.13525							6	1.7572	5.89011	2.88718	2.88718	5.89011
ChIP Rad52-FLAG (Ip/Input)															ChIP Rad52-FLAG (Ip/Input)															ChIP Rad52-FLAG (Ip/Input)													ChIP Rad52-FLAG (Ip/Input)
			Biological Replicate															Biological Replicate															Biological Replicate												Biological Replicate
ARG5,6	Time (h)	1	2	3	médiane	MAX	MIN								ARG5,6	Time (h)	1	2	3	médiane	MAX	MIN								ARG5,6	Time (h)	1	2	3	médiane	MAX	MIN						ARG5,6	Time (h)	1	2	3	médiane	MAX
	0	0.539419	0.614072	0.203723	0.539419	0.614072	0.203723									0	0.514107	0.751366	6.26703	0.751366	6.26703	0.514107									0	0.25	0.156205	0.388998	0.25	0.388998	0.156205							0	1.75144	0.190661	0.309298	0.309298	1.75144
	2	0.342105	0.490137	0.129598	0.342105	0.490137	0.129598									2	0.81153	0.683215	1.46589	0.81153	1.46589	0.683215									2	0.54878	0.55665	0.402778	0.54878	0.55665	0.402778							2	0.432522	0.224009	0.475973	0.432522	0.475973
	4	0.590234	0.635897	0.120809	0.590234	0.635897	0.120809									4	0.330218	0.559633	0.263056	0.330218	0.559633	0.263056									4	1.13514	0.792453	0.513208	0.792453	1.13514	0.513208							4	0.802734	0.41498	1.98039	0.802734	1.98039
	6	0.496753	0.606818	1.09426	0.606818	1.09426	0.496753									6	1.23342	0.542744	0.229122	0.542744	1.23342	0.229122									6	0.682119	0.555828	0.881068	0.682119	0.881068	0.555828							6	1.04167	0.564103	1.72453	1.04167	1.72453
0.6kb			Biological Replicate															Biological Replicate															Biological Replicate												Biological Replicate
	Time (h)	1	2	3	médiane	MAX	MIN								0.6kb	Time (h)	1	2	3	médiane	MAX	MIN								0.6kb	Time (h)	1	2	3	médiane	MAX	MIN						0.6kb	Time (h)	1	2	3	médiane	MAX
	0	0.610984	0.489362	0.268889	0.489362	0.610984	0.268889									0	0.651822	0.850877	5.42553	0.850877	5.42553	0.651822									0	0.386473	0.348794	0.544304	0.386473	0.544304	0.348794							0	0.871589	0.227006	0.167176	0.227006	0.871589
	2	12.2105	9.65	6.40449	9.65	12.2105	6.40449									2	25.4658	12.7097	16.4091	16.4091	25.4658	12.7097									2	7.31959	6.80723	21.3679	10.7168	21.3679	6.80723							2	6.43182	10.122	10.5897	10.122	10.5897
	4	35.1145	21.4088		28.2616	35.1145	21.4088									4	29.6183	25.6809	14.9936	25.6809	29.6183	14.9936									4	15.9829	18.0682	43.5696	18.0682	43.5696	15.9829							4	15.6531	22.4329	14.6789	15.6531	22.4329
	6	19.8473	18.5185		19.1829	19.8473	18.5185									6	28.0556	26.6038	9.0411	26.6038	28.0556	9.0411									6	12.7344	12.0221	34.8416	14.7266	34.8416	12.0221							6	17.1492	32.7696	19.5283	19.5283	32.7696
7.6kb			Biological Replicate															Biological Replicate															Biological Replicate												Biological Replicate
	Time (h)	1	2	3	médiane	MAX	MIN								7.6kb	Time (h)	1	2	3	médiane	MAX	MIN								7.6kb	Time (h)	1	2	3	médiane	MAX	MIN						7.6kb	Time (h)	1	2	3	médiane	MAX
	0	0.40625	0.387524	0.10953	0.387524	0.40625	0.10953									0	0.252344	0.3		0.276172	0.3	0.252344									0	0.22314	0.105833	0.196837	0.196837	0.22314	0.105833							0	0.314176	0.0894265	0.111864	0.111864	0.314176
	2	1.43018	1.30198	0.923858	1.30198	1.43018	0.923858									2	3.23661	1.78571	2.01022	2.01022	3.23661	1.78571									2	1.25691	1.16319	2.01581	1.25691	2.01581	1.16319							2	0.954902	1.51918	1.35983	1.35983	1.51918
	4	6.86275	4.15232		5.50753	6.86275	4.15232									4	5.52083	5.41176	3.51493	5.41176	5.52083	3.51493									4	3.30405	3.63725	8.25664	3.63725	8.25664	3.30405							4	2.35529	7.23965	4.63077	4.63077	7.23965
	6	7.97753	6.63594		7.30674	7.97753	6.63594									6	8.43003	6.11321		7.27162	8.43003	6.11321									6	3.91393	4.04007	15.3477	4.04007	15.3477	3.91393							6	2.95473	14.6154	6.35897	6.35897	14.6154
ChIP Rad51 (Ip/Input)															ChIP Rad51 (Ip/Input)															ChIP Rad51 (Ip/Input)													ChIP Rad51 (Ip/Input)
		Biological Replicate															Biological Replicate																Biological Replicate													Biological Replicate
ARG5,6	Time (h)	1	2	3	4	médiane	MAX	MIN							ARG5,6	Time (h)	1	2	3	4	médiane	MAX	MIN							ARG5,6	Time (h)	1	2	3	4	médiane	MAX	MIN					ARG5,6	Time (h)	1	2	3	médiane	MAX
	0	0.0146347	0.088326	0.0966229	0.0992958	0.0924744	0.0992958	0.0146347								0	0.0176991	0.0636829	0.138414	0.0943563	0.0790196	0.138414	0.0176991								0	0.218676	0.03933	0.0120802	0.0266839	0.033007	0.218676	0.0120802						0	0.393678	0.0285992	0.0840607	0.0840607	0.393678
	2	0.0134228	0.0768041	0.166209	0.160739	0.118772	0.166209	0.0134228								2	0.03	0.0580046	0.0787611	0.1341	0.0683829	0.1341	0.03								2	0.242545	0.02953	0.0243171	0.0298635	0.0296967	0.242545	0.0243171						2	0.0196903	0.0354312	0.0649886	0.0354312	0.0649886
	4	0.0631893	0.0829876	0.118704	0.121525	0.100846	0.121525	0.0631893								4	0.0477212	0.090681	0.172355	0.172926	0.131518	0.172926	0.0477212								4	0.227364	0.03794	0.139917	0.358039	0.183641	0.358039	0.03794						4	0.0792969	0.0933198	0.192997	0.0933198	0.192997
	6	0.01378	0.127484	0.12017	0.11256	0.116365	0.127484	0.01378								6	0.0202233	0.103777	0.0978593	0.197214	0.100818	0.197214	0.0202233								6	0.471042	0.1249	0.0511258	0.137607	0.131253	0.471042	0.0511258						6	0.095679	0.150142	0.190189	0.150142	0.190189
		Biological Replicate															Biological Replicate																Biological Replicate													Biological Replicate
0.6kb	Time (h)	1	2	3	4	médiane	MAX	MIN							0.6kb	Time (h)	1	2	3	4	médiane	MAX	MIN							0.6kb	Time (h)	1	2	3	4	médiane	MAX	MIN					0.6kb	Time (h)	1	2	3	médiane	MAX
	0	0.0188873	0.059808	0.111848	0.103532	0.08167	0.111848	0.0188873								0	0.027	0.039	0.133	0.093	0.066	0.133	0.027								0	0.139442	0.1016	0.0152657	0.0424861	0.072043	0.139442	0.0152657						0	0.0567515	0.0396534	0.0880192	0.0567515	0.0880192
	2	2.11717	2.61598	6.72764	2.87374	2.74486	6.72764	2.11717								2	3.298	2.435	5.756	6.432	4.527	6.432	2.435								2	3.92126	2.12044	1.09794	1.39157	1.756	3.92126	1.09794						2	9.06504	6.48649	7.08589	7.08589	9.06504
	4	6.66667	6.85851	9.68354	5.9744	6.76259	9.68354	6.66667								4	8.59	7.61	12.158	11.975	10.283	12.158	7.61								4	6.96629	8.61207		7.07386	7.02008	8.61207	6.96629						4	20.3791	11.2844	17.2897	17.2897	20.3791
	6	2.97894	7.17172	9.80707	2.57955	5.07533	9.80707	2.57955								6	4.055	5.815	8.003	9.032	6.909	9.032	4.055								6	6.78641	8.32808	3.32812	3.97059	5.3785	8.32808	3.32812						6	25.7928	17.1698	13.0645	17.1698	25.7928
			Biological Replicate															Biological Replicate															Biological Replicate													Biological Replicate
7.6kb	Time (h)	1	2	3	médiane	MAX	MIN								7.6kb	Time (h)	1	2	3	médiane	MAX	MIN								7.6kb	Time (h)	1	2	3	médiane	MAX	MIN						7.6kb	Time (h)	1	2	3	médiane	MAX
	0	0.006	0.07	0.074	0.07	0.074	0.006									0	0.0137302	0.110227	0.0672677	0.0672677	0.110227	0.0137302									0	0.01	0.03	0.16	0.03	0.16	0.01							0	0.04	0.04	0.06	0.04	0.06
	2	0.143	0.858	0.58	0.58	0.858	0.143									2	1.43982	1.95021	2.27273	1.95021	2.27273	1.43982									2	0.23	0.22	0.4	0.23	0.4	0.22							2	0.32	2.25	1.12	1.12	2.25
	4	1.086	2.279	0.988	1.086	2.279	0.988									4	7.02315	7.00704	6.10465	7.00704	7.02315	6.10465									4	0.73	0.95	1.07	0.95	1.07	0.73							4	1.24	11.97	5.17	5.17	11.97
	6	0.391	2.102	0.962	0.962	2.102	0.391									6	4.64668	6.32353	8.8764	6.32353	8.8764	4.64668									6	0.72	1.08	1.27	1.08	1.27	0.72							6	3.76	22.64	10.56	10.56	22.64
[truncated: 6 more columns]
