# Supplementary material for: Rad52-Rad51 association is essential to protect Rad51 filaments against Srs2, but facultative for filament formation
Source: eLife journal article supplement (doi:10.7554/elife.32744), 2018-07-09
Supplement: supp [file elife-32744-supp-v1.zip › elife_poa_e32744_Figure_4_source_data_1.xlsx]

## Sheet: Feuil1
Source data Figure 4A																			srs2∆														rad52-Y376A														rad52-Y376A srs2∆
				WT
ChIP RPA (Ip/Input)															ChIP RPA (Ip/Input)															ChIP RPA (Ip/Input)													ChIP RPA (Ip/Input)
			Biological Replicate															Biological Replicate															Biological Replicate													Biological Replicate
ARG5,6	Time (h)	1	2	3	médiane	MAX	MIN								ARG5,6	Time (h)	1	2	3	médiane	MAX	MIN								ARG5,6	Time (h)	1	2	3	médiane	MAX	MIN						ARG5,6	Time (h)	1	2	3	médiane	MAX
	0	1.37967	0.572482	0.455399	0.572482	1.37967	0.455399									0	4.26332	0.565789	0.407407	0.565789	4.26332	0.407407									0	0.128135	0.292857	0.29	0.29	0.292857	0.128135							0	0.0677524	0.37827	0.41	0.37827	0.41
	2	5.50239	0.613508	0.635104	0.635104	5.50239	0.613508									2	0.235033	0.492891	0.409962	0.409962	0.492891	0.235033									2	0.194194	1.35897	0.446	0.446	1.35897	0.194194							2	0.1496	0.844523	0.75	0.75	0.844523
	4	0.227176	0.582589	0.325112	0.325112	0.582589	0.227176									4	3.39564	0.415179	0.323144	0.415179	3.39564	0.323144									4	0.2	0.361244	0.245	0.245	0.361244	0.2							4	0.213103	1.77966	0.39	0.39	1.77966
	6	0.613636	0.766839	0.326087	0.613636	0.766839	0.326087									6	0.198526	1.0315	0.300836	0.300836	1.0315	0.198526									6	0.198039	0.373576	0.331	0.331	0.373576	0.198039							6	0.197235	1.36963	0.69	0.69	1.36963
			Biological Replicate															Biological Replicate															Biological Replicate													Biological Replicate
0.6kb	Time (h)	1	2	3	médiane	MAX	MIN								0.6kb	Time (h)	1	2	3	médiane	MAX	MIN								0.6kb	Time (h)	1	2	3	médiane	MAX	MIN						0.6kb	Time (h)	1	2	3	médiane	MAX
	0	1.4714	0.698113	0.713024	0.713024	1.4714	0.698113									0	5.02024	0.697289	0.672968	0.697289	5.02024	0.672968									0	0.322464	0.461407	0.378	0.378	0.461407	0.322464							0	0.185053	0.457295	0.459091	0.457295	0.459091
	2		7.53472	8.68687	8.1108	8.68687	7.53472									2	14.0373	11.0222	6.76056	11.0222	14.0373	6.76056									2	11.284	5.76471	7.027	7.027	11.284	5.76471							2	8.83212	8.15385	6.43478	8.15385	8.83212
	4		10.8291	10.5121	10.6706	10.8291	10.5121									4	21.8321	16.1939	14.6776	16.1939	21.8321	14.6776									4	20.5397	14.4355	16.159	16.159	20.5397	14.4355							4	19.5122	25.4478	24.5257	24.5257	25.4478
	6		7.6378	6.70455	7.17117	7.6378	6.70455									6	11.3889	10.0725	8.33333	10.0725	11.3889	8.33333									6	12.2222	7.40845	9.482	9.482	12.2222	7.40845							6	20.0806	23.0479	21.5108	21.5108	23.0479
			Biological Replicate															Biological Replicate															Biological Replicate													Biological Replicate
7.6kb	Time (h)	1	2	3	médiane	MAX	MIN								7.6kb	Time (h)	1	2	3	médiane	MAX	MIN								7.6kb	Time (h)	1	2	3	médiane	MAX	MIN						7.6kb	Time (h)	1	2	3	médiane	MAX
	0	1.207	0.278	0.29	0.29	1.207	0.278									0	3.62	0.357	0.293	0.357	3.62	0.293									0	0.0749169	0.177419	0.108	0.108	0.177419	0.0749169							0	0.0378657	0.19965	0.182104	0.182104	0.19965
	2	6.622	1.2	1.859	1.859	6.622	1.2									2	1.819	1.767	1.581	1.767	1.819	1.581									2	0.920233	1.50333	0.968	0.968	1.50333	0.920233							2	0.685771	1.5368	1.26695	1.26695	1.5368
	4	4.712	3.533	2.444	3.533	4.712	2.444									4	6.719	4.33	5.244	5.244	6.719	4.33									4	2.52709	2.48659	2.79	2.52709	2.79	2.48659							4	2.57931	6.6358	4.3046	4.3046	6.6358
	6	7.865	3.78	4.07	4.07	7.865	3.78									6	3.403	3.977	4.607	3.977	4.607	3.403									6	4.38251	2.6742	2.661	2.6742	4.38251	2.661							6	5.01792	4.7574	5.17134	5.01792	5.17134
ChIP Rad52-FLAG (Ip/Input)															ChIP Rad52-FLAG (Ip/Input)															ChIP Rad52-FLAG (Ip/Input)													ChIP Rad52-FLAG (Ip/Input)
			Biological Replicate															Biological Replicate															Biological Replicate												Biological Replicate
ARG5,6	Time (h)	1	2	3	médiane	MAX	MIN								ARG5,6	Time (h)	1	2	3	médiane	MAX	MIN								ARG5,6	Time (h)	1	2	3	médiane	MAX	MIN						ARG5,6	Time (h)	1	2	3	4	médiane
	0	0.539419	0.614072	0.203723	0.539419	0.614072	0.203723									0	0.514107	0.751366	6.26703	0.751366	6.26703	0.514107									0	0.112008	0.439286	0.213307	0.213307	0.439286	0.112008							0	0.478873	0.649524	0.789516	0.740323	0.694923
	2	0.342105	0.490137	0.129598	0.342105	0.490137	0.129598									2	0.81153	0.683215	1.46589	0.81153	1.46589	0.683215									2	0.0895455	0.818803	0.310811	0.310811	0.818803	0.0895455							2	1.92933	1.38403	0.699107	0.681761	1.04157
	4	0.590234	0.635897	0.120809	0.590234	0.635897	0.120809									4	0.330218	0.559633	0.263056	0.330218	0.559633	0.263056									4	0.224116	0.811005	0.174615	0.224116	0.811005	0.174615							4	1.10508	0.593923	0.82243	0.786251	0.804341
	6	0.496753	0.606818	1.09426	0.606818	1.09426	0.496753									6	1.23342	0.542744	0.229122	0.542744	1.23342	0.229122									6	0.169714	0.81549	0.311371	0.311371	0.81549	0.169714							6	1.72493	0.04	0.820672	0.870918	0.870918
0.6kb			Biological Replicate															Biological Replicate															Biological Replicate												Biological Replicate
	Time (h)	1	2	3	médiane	MAX	MIN								0.6kb	Time (h)	1	2	3	médiane	MAX	MIN								0.6kb	Time (h)	1	2	3	médiane	MAX	MIN						0.6kb	Time (h)	1	2	3	4	médiane
	0	0.610984	0.489362	0.268889	0.489362	0.610984	0.268889									0	0.651822	0.850877	5.42553	0.850877	5.42553	0.651822									0	0.133075	0.404803	0.198165	0.198165	0.404803	0.133075							0	0.183486	0.441281	0.634091	0.96129	0.537686
	2	12.2105	9.65	6.40449	9.65	12.2105	6.40449									2	25.4658	12.7097	16.4091	16.4091	25.4658	12.7097									2	13.8272	10.6667	11.027	11.027	13.8272	10.6667							2	16.1176	8	11.7391	19.5531	13.9284
	4	35.1145	21.4088		28.2616	35.1145	21.4088									4	29.6183	25.6809	14.9936	25.6809	29.6183	14.9936									4	38.3459	36.8548	31.6556	36.8548	38.3459	31.6556							4	35.8006	43.5821	65.7182	39.3939	41.488
	6	19.8473	18.5185		19.1829	19.8473	18.5185									6	28.0556	26.6038	9.0411	26.6038	28.0556	9.0411									6	16.7925	24.9577	22.3316	22.3316	24.9577	16.7925							6	28.7349	44.7103		67.0073	44.7103
7.6kb			Biological Replicate															Biological Replicate															Biological Replicate												Biological Replicate
	Time (h)	1	2	3	médiane	MAX	MIN								7.6kb	Time (h)	1	2	3	médiane	MAX	MIN								7.6kb	Time (h)	1	2	3	médiane	MAX	MIN						7.6kb	Time (h)	1	2	3	4	5
	0	0.40625	0.387524	0.10953	0.387524	0.40625	0.10953									0	0.252344	0.3		0.276172	0.3	0.252344									0	0.0798715	0.206452	0.0913765	0.0913765	0.206452	0.0798715							0	0.104208	0.222417	0.243328	0.431611	0.326992
	2	1.43018	1.30198	0.923858	1.30198	1.43018	0.923858									2	3.23661	1.78571	2.01022	2.01022	3.23661	1.78571									2	0.863839	1.4102	1.08602	1.08602	1.4102	0.863839							2	1.10989	2.18182	2.4322	1.91617	1.88105
	4	6.86275	4.15232		5.50753	6.86275	4.15232									4	5.52083	5.41176	3.51493	5.41176	5.52083	3.51493									4	4.37975	4.63602	3.67403	4.37975	4.63602	3.67403							4	4.42581	9.50617	8.67816	5.41311	7.74603
	6	7.97753	6.63594		7.30674	7.97753	6.63594									6	8.43003	6.11321		7.27162	8.43003	6.11321									6	4.55429	6.89266	4.15138	4.55429	6.89266	4.15138							6	5.91837	7.15976		11.4545	10.3279
ChIP Rad51 (Ip/Input)															ChIP Rad51 (Ip/Input)															ChIP Rad51 (Ip/Input)													ChIP Rad51 (Ip/Input)
		Biological Replicate															Biological Replicate																Biological Replicate													Biological Replicate
ARG5,6	Time (h)	1	2	3	4	médiane	MAX	MIN							ARG5,6	Time (h)	1	2	3	4	médiane	MAX	MIN							ARG5,6	Time (h)	1	2	3	médiane	MAX	MIN						ARG5,6	Time (h)	1	2	3	médiane	MAX
	0	0.0146347	0.088326	0.0966229	0.0992958	0.0924744	0.0992958	0.0146347								0	0.0176991	0.0636829	0.138414	0.0943563	0.0790196	0.138414	0.0176991								0	0.028	0.119	0.061	0.061	0.119	0.028							0	0.0192182	0.067002	0.071619	0.067002	0.071619
	2	0.0134228	0.0768041	0.166209	0.160739	0.118772	0.166209	0.0134228								2	0.03	0.0580046	0.0787611	0.1341	0.0683829	0.1341	0.03								2	0.034	0.185	0.106	0.106	0.185	0.034							2	0.02656	0.385159	0.152852	0.152852	0.385159
	4	0.0631893	0.0829876	0.118704	0.121525	0.100846	0.121525	0.0631893								4	0.0477212	0.090681	0.172355	0.172926	0.131518	0.172926	0.0477212								4	0.048	0.418	0.723	0.418	0.723	0.048							4	0.0498851	0.154237	0.177072	0.154237	0.177072
	6	0.01378	0.127484	0.12017	0.11256	0.116365	0.127484	0.01378								6	0.0202233	0.103777	0.0978593	0.197214	0.100818	0.197214	0.0202233								6	0.06	0.155	0.118	0.118	0.155	0.06							6	0.0371889	0.114327	0.31124	0.114327	0.31124
		Biological Replicate															Biological Replicate																Biological Replicate													Biological Replicate
0.6kb	Time (h)	1	2	3	4	médiane	MAX	MIN							0.6kb	Time (h)	1	2	3	4	médiane	MAX	MIN							0.6kb	Time (h)	1	2	3	médiane	MAX	MIN						0.6kb	Time (h)	1	2	3	médiane	MAX
	0	0.0188873	0.059808	0.111848	0.103532	0.08167	0.111848	0.0188873								0	0.027	0.039	0.133	0.093	0.066	0.133	0.027								0	0.0313406	0.0842196	0.0511927	0.0511927	0.0842196	0.0313406							0	0.0192171	0.0501779	0.0834091	0.0501779	0.0834091
	2	2.11717	2.61598	6.72764	2.87374	2.74486	6.72764	2.11717								2	3.298	2.435	5.756	6.432	4.527	6.432	2.435								2	1.05058	0.858824	0.962162	0.962162	1.05058	0.858824							2	2.56569	1.65385	2.41304	2.41304	2.56569
	4	6.66667	6.85851	9.68354	5.9744	6.76259	9.68354	6.66667								4	8.59	7.61	12.158	11.975	10.283	12.158	7.61								4	2.62369	3.12097	3.21854	3.12097	3.21854	2.62369							4	8.39024	11.2687	14.7696	11.2687	14.7696
	6	2.97894	7.17172	9.80707	2.57955	5.07533	9.80707	2.57955								6	4.055	5.815	8.003	9.032	6.909	9.032	4.055								6		1.85634	2.17617	2.01625	2.17617	1.85634							6	2.17742	9.39547		5.78644	9.39547
			Biological Replicate															Biological Replicate															Biological Replicate													Biological Replicate
7.6kb	Time (h)	1	2	3	médiane	MAX	MIN								7.6kb	Time (h)	1	2	3	médiane	MAX	MIN								7.6kb	Time (h)	1	2	3	médiane	MAX	MIN						7.6kb	Time (h)	1	2	3	médiane	MAX
	0	0.006	0.07	0.074	0.07	0.074	0.006									0	0.0137302	0.110227	0.0672677	0.0672677	0.110227	0.0137302									0	0.0167774	0.0637097	0.0353234	0.0353234	0.0637097	0.0167774							0	0.0166609	0.0448336	0.0500785	0.0448336	0.0500785
	2	0.143	0.858	0.58	0.58	0.858	0.143									2	1.43982	1.95021	2.27273	1.95021	2.27273	1.43982									2	0.103502	0.193126	0.153763	0.153763	0.193126	0.103502							2	0.399209	0.809524	1.09746	0.809524	1.09746
	4	1.086	2.279	0.988	1.086	2.279	0.988									4	7.02315	7.00704	6.10465	7.00704	7.02315	6.10465									4	0.270443	0.436782	0.773481	0.436782	0.773481	0.270443							4	2.13103	5.95679	4.58621	4.58621	5.95679
	6	0.391	2.102	0.962	0.962	2.102	0.391									6	4.64668	6.32353	8.8764	6.32353	8.8764	4.64668									6		0.463277	0.376147	0.419712	0.463277	0.376147							6		3.20118	9.4704	6.33579	9.4704
[truncated: 6 more columns]
