# Supplementary material for: Rad52-Rad51 association is essential to protect Rad51 filaments against Srs2, but facultative for filament formation
Source: eLife journal article supplement (doi:10.7554/elife.32744), 2018-07-09
Supplement: supp [file elife-32744-supp-v1.zip › elife_poa_e32744_Figure_5_figure_supplement_1.pdf]

**A**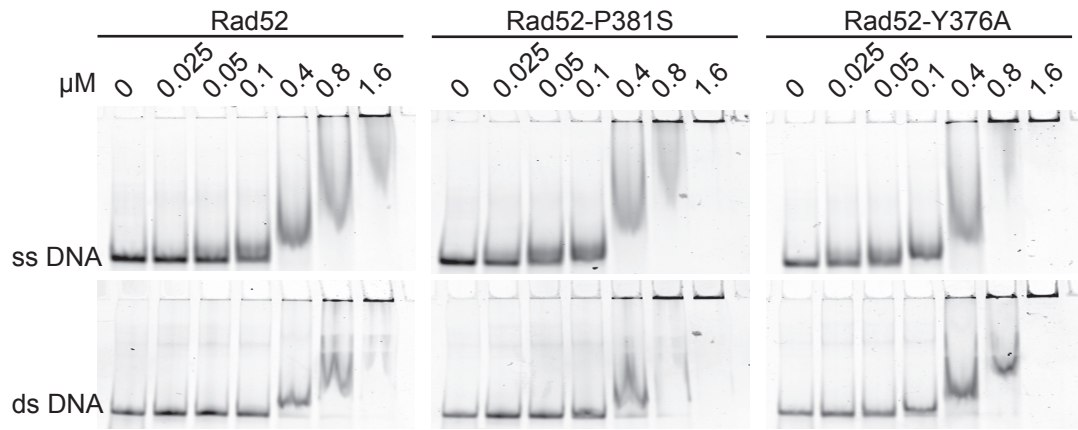**B**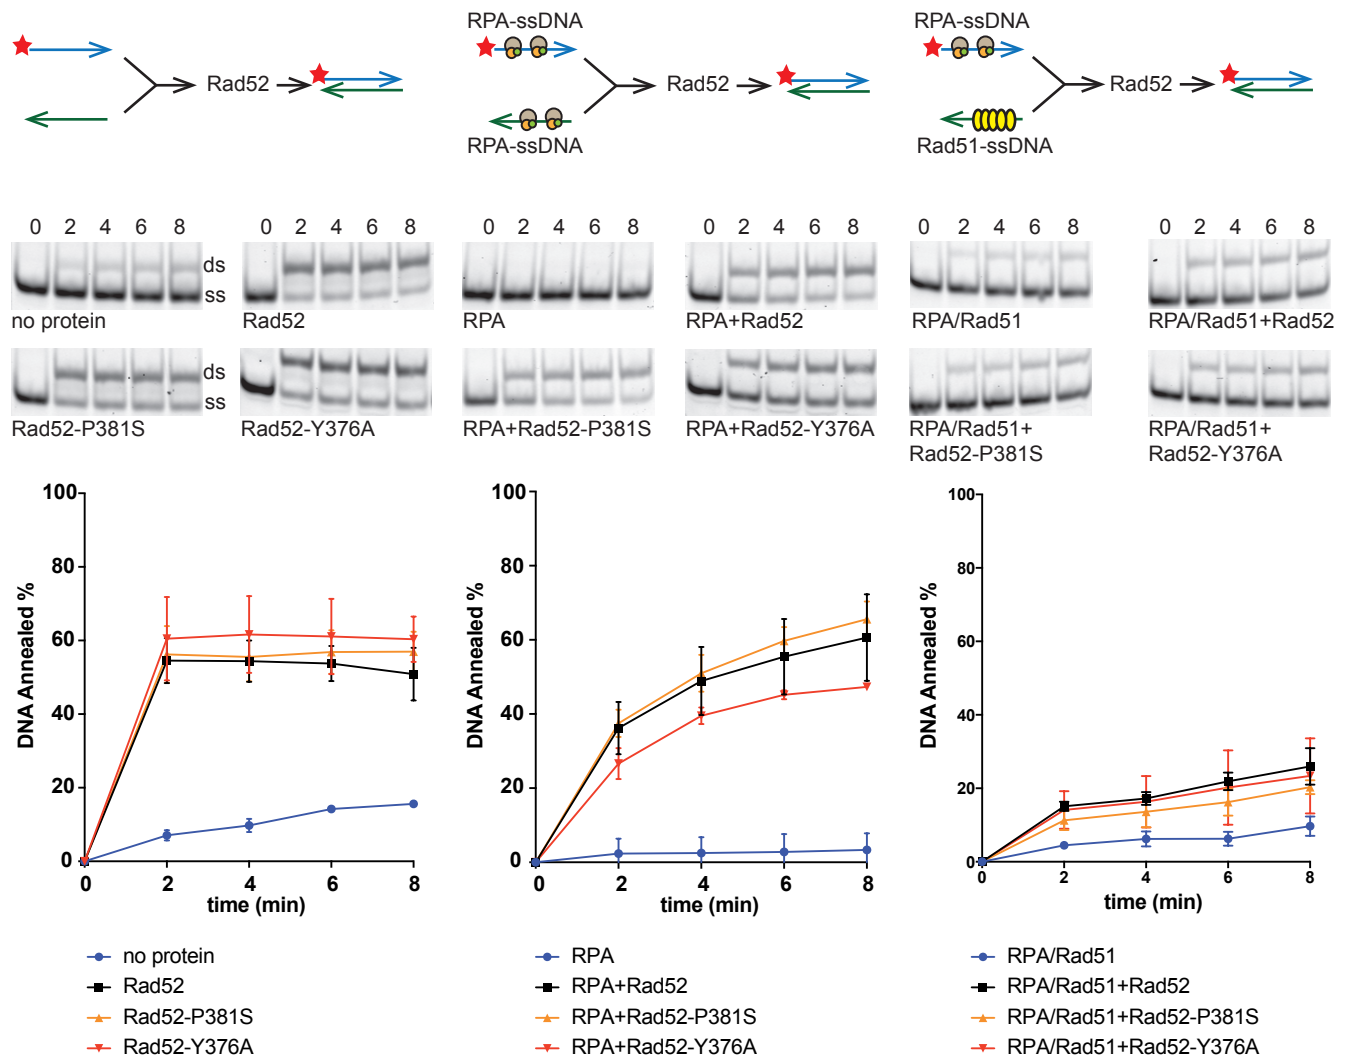

**Figure 5-figure supplement 1. DNA binding and strand annealing activity of Rad52 mutants.** (A) Binding of purified Rad52-FLAG, Rad52-P381S-FLAG and Rad52-Y376A-FLAG to ssDNA and dsDNA (protein/base ratio: 1/10, 1/5, 1/2.5, 1/1.25, 1/0.6, and 1/0.15). (B) Rad52-FLAG, Rad52-P381S-FLAG and Rad52-Y376A-FLAG annealing activities are similarly inhibited by RPA and Rad51. Experiments are represented schematically at the top of the panels. Reactions were performed with labeled 48bp-long complementary primers. Each oligonucleotide was incubated without proteins, with 30nM RPA or with 134nM Rad51 before addition of 40nM of WT Rad52 or mutant proteins. Samples were separated on 8% native TBE polyacrylamide gels. The ratio between annealed DNA and the sum of ssDNA and dsDNA was plotted. Data are presented as the mean  $\pm$  SEM of at least 3 independent experiments.
