# Supplementary material for: Rad52-Rad51 association is essential to protect Rad51 filaments against Srs2, but facultative for filament formation
Source: eLife journal article supplement (doi:10.7554/elife.32744), 2018-07-09
Supplement: supp [file elife-32744-supp-v1.zip › elife_poa_e32744_Figure_5_figure_supplement_1_source_data_1.xlsx]

## Sheet: Feuil1
Source data Figure 5-Figure supplemental 1B
DNA annealed (%)
		no protein			Rad52
Biological replicate	1	2	3		1	2	3	4
time (min)
0	0	0	0		0	0	0	0
2	7.28	5.579	8.423		50.237	63.536	51.285	53.2
4	11.779	9.006	8.433		49.606	62.551	53.003	52.4
6	14.326	13.128	15.205		48.791	60.184	52.178	53.9
8	16.638	15.261	14.934		48.258	61.463	45.643	48.1
		Rad52-P381S					Rad52-Y376A
Biological replicate	1	2	3		1	2	3	4	5
time (min)
0	0	0	0		0	0	0	0	0
2	65.095	51.264	52.371		70.33	42.566	68.3	64.9	56.3
4	62.641	49.638	54.333		66.663	46.28	68.8	70.9	55.6
6	63.446	51.882	55.253		68.058	49.451	68.6	69	50.4
8	63.03	52.654	55.216		68.352	54.54	62.6	62.6	53.7
		RPA				RPA+Rad52
Biological replicate	1	2	3		1	2	3
time (min)
0	0	0	0		0	0	0
2	0	0	7.017		44.241	33.396	30.941
4	0	0	7.514		59.241	41.721	45.738
6	0	0	8.362		66.334	46.208	53.818
8	1.597	0	8.505		72.376	49.025	60.388
		RPA+Rad52-P381S				RPA+Rad52-Y376A
Biological replicate	1	2	3		1	2	3
time (min)
0	0	0	0		0	0	0
2	41.685	36.059	34.777		27.709	30.117	22.03
4	56.67	48.886	47.463		42.071	38.693	37.755
6	63.941	58.301	56.958		46.513	44.816	44.157
8	71.045	62.221	63.469		48.37	46.357	47.294
	RPA/Rad51					RPA/Rad51+Rad52
Biological replicate	1	2			1	2	3
time (min)
0	0	0			0	0	0
2	5.018	3.918			15.847	13.608	15.804
4	7.648	4.763			17.237	15.501	18.944
6	7.638	4.93			21.794	19.562	24.327
8	11.545	7.818			22.998	23.225	31.678
		RPA/Rad51+Rad52-P381S				RPA/Rad51+Rad52-Y376A
Biological replicate	1	2	3		1	2	3
time (min)
0	0	0	0		0	0	0
2	9.006	14.162	10.643		12.153	10.269	19.94
4	9.589	18.073	13.237		14.426	10.486	24.121
6	13.34	20.362	15.006		17.732	11.51	31.327
8	18.913	22.487	19.6		21.664	14.092	34.345
