# Supplementary material for: Rad52-Rad51 association is essential to protect Rad51 filaments against Srs2, but facultative for filament formation
Source: eLife journal article supplement (doi:10.7554/elife.32744), 2018-07-09
Supplement: supp [file elife-32744-supp-v1.zip › elife_poa_e32744_Figure_5_figure_supplement_2.pdf]

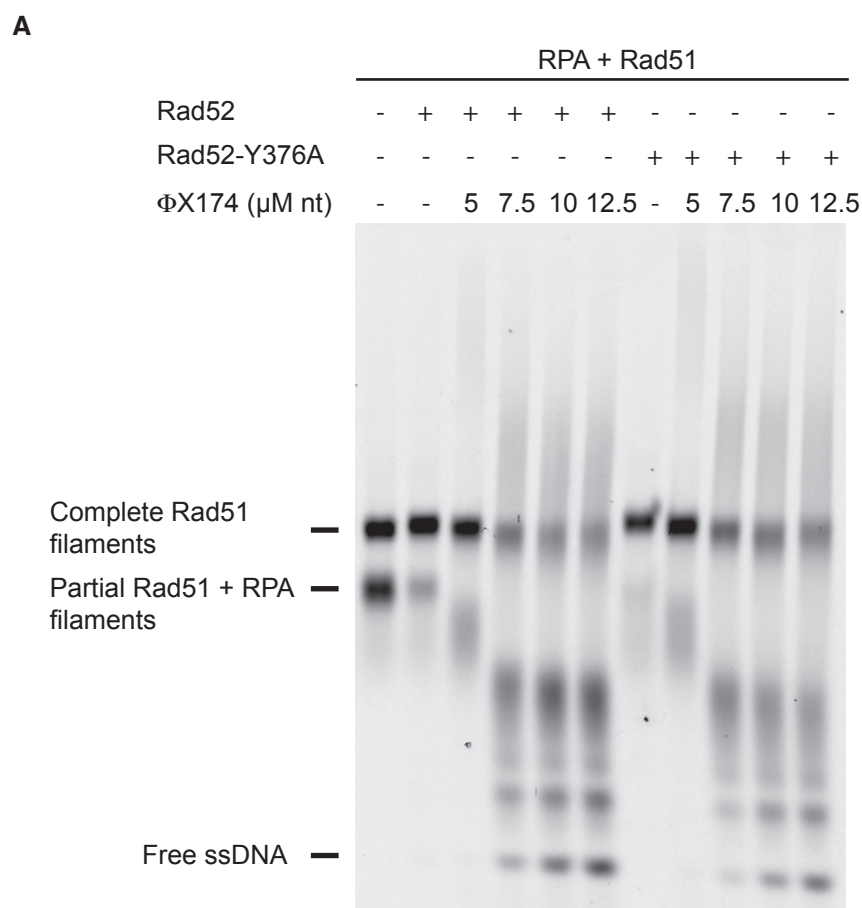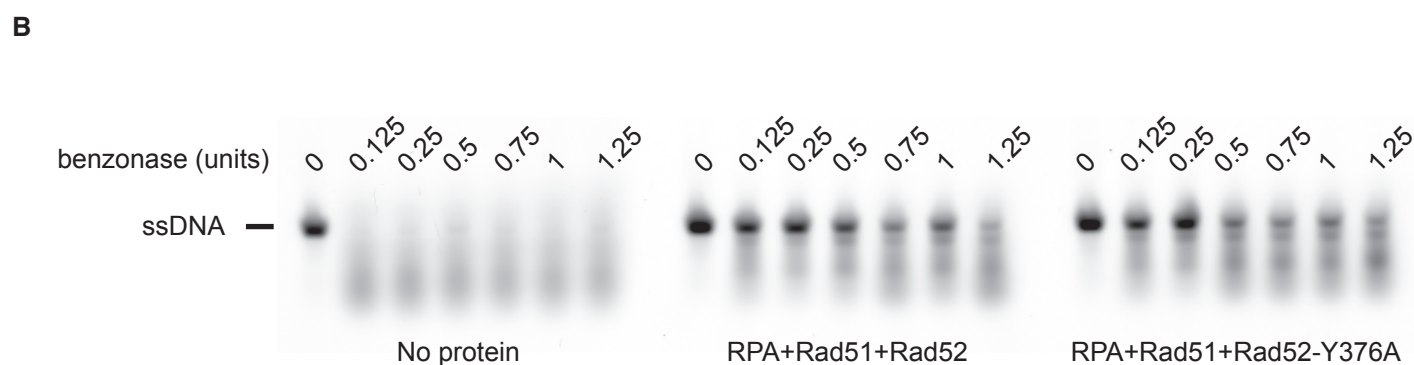

**Figure 5-figure supplement 2.** Rad51 filament stability challenged with excess of ssDNA or benzonase treatment. All experiments were performed with FLAG-tagged Rad52 proteins. (A) Rad51 filament stability was challenged with excess of ssDNA. The addition of Rad52 or Rad52-Y376A together with Rad51 to RPA-coated 400-nt-long ssDNA strongly catalyzes the formation of complete Rad51 filaments. Addition of increasing amounts of competitor ΦX174 ssDNA after Rad51 filament formation leads to their destabilization. (B) Benzonase assay. Rad51 was assembled as in (A) with Rad52 or Rad52-Y376A and increasing amount of benzonase was added to the reaction. ssDNA was loaded on agarose gel after deproteinization. As a control, naked ssDNA was also incubated with benzonase.
