# Supplementary material for: Rad52-Rad51 association is essential to protect Rad51 filaments against Srs2, but facultative for filament formation
Source: eLife journal article supplement (doi:10.7554/elife.32744), 2018-07-09
Supplement: supp [file elife-32744-supp-v1.zip › elife_poa_e32744_Figure_5_figure_supplement_3.pdf]

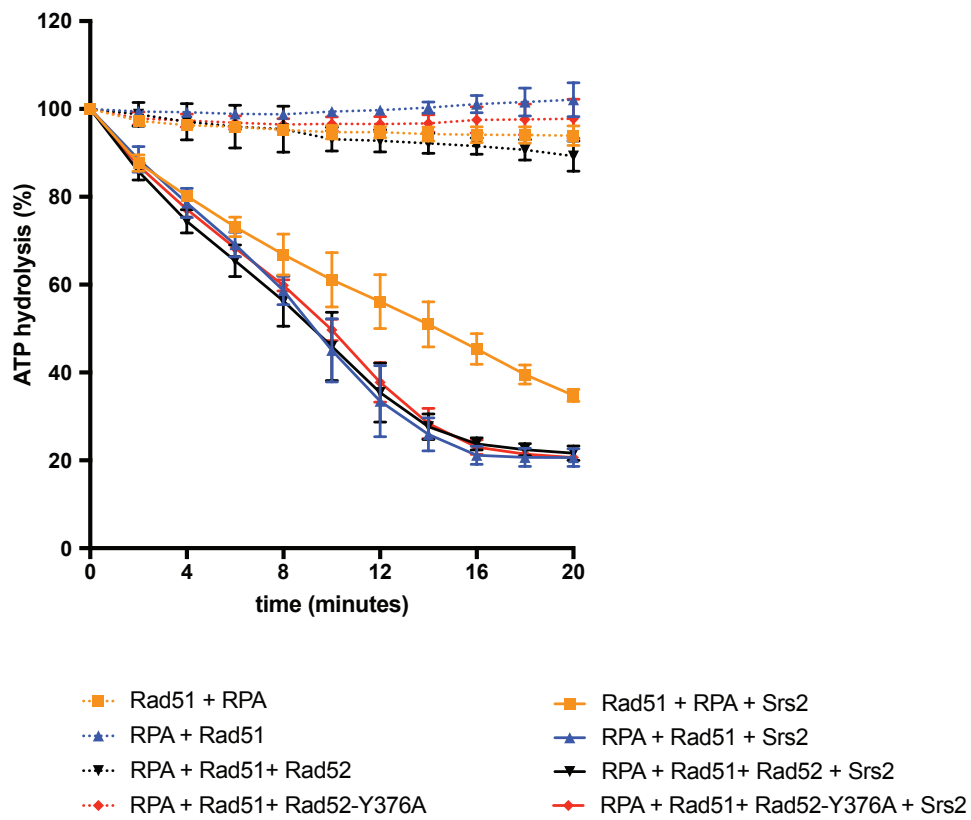

**Figure 5-figure supplement 3.** Measurement of Srs2 ATPase activity. Rad51 filament formation reactions were performed as described in the STAR Methods section and the main text. ATP hydrolysis was measured as a function of time after Rad51 filament formation and addition (or not) of 50nM Srs2. Data are presented as the mean  $\pm$  SEM of at least 3 independent experiments.
