# Supplementary material for: Rad52-Rad51 association is essential to protect Rad51 filaments against Srs2, but facultative for filament formation
Source: eLife journal article supplement (doi:10.7554/elife.32744), 2018-07-09
Supplement: supp [file elife-32744-supp-v1.zip › elife_poa_e32744_Figure_5_figure_supplement_3_source_data_1.xlsx]

## Sheet: Feuil1
Source data Figure 1-Figure supplemental 3
ATP hydrolysis (%)
	Rad51 + RPA			Rad51 + RPA + Srs2
Biological replicate	1	2		2	3
time (min)
0	100	100		100	100
2	97.59	97.07		88.99	86.38
4	96.86	95.76		80.6	79.8
6	96.55	95.35		71.59	74.74
8	95.92	94.54		63.59	70.2
10	95.82	93.64		56.74	65.51
12	95.61	93.81		51.81	60.51
14	95.4	93.15		47.34	54.61
16	95.4	92.83		42.88	47.81
18	95.4	92.75		38.03	41.07
20	95.5	92.34		33.8	35.78
	RPA + Rad51				RPA + Rad51 + Srs2
time (min)	Exp. 1	Exp. 2		Exp. 1	Exp. 2	Exp. 3
0	100	100		100	100	100
2	98.82	100		91.36	88.68	85.54
4	99.22	99.27		81.93	78.56	75.3
6	99.12	98.65		71.49	69.86	66.06
8	98.82	98.76		59.82	61.15	55.02
10	99.41	99.38		47.59	50.6	36.95
12	99.51	100		36.92	39.28	24.2
14	99.41	101.24		27.61	28.51	21.59
16	99.71	102.49		19.64	23.5	20.28
18	99.31	103.83		19.08	23.07	19.98
20	99.41	104.87		19.42	22.96	19.48
	RPA + Rad51+ Rad52				RPA + Rad51+ Rad52 + Srs2
time (min)	Exp. 1	Exp. 2		Exp. 1	Exp. 2	Exp. 3
0	100	100		100	100	100
2	100	96.89		88.02	84.92	84.37
4	100	94.16		77.41	72.41	73.4
6	99.42	92.51		68.82	61.6	65.84
8	99.13	91.69		59.92	49.63	59.32
10	95.04	91.23		49.63	37.01	51.24
12	94.56	90.96		37.96	27.81	40.58
14	93.78	90.59		28.21	24.49	30.23
16	92.91	90.23		24.07	22.25	24.95
18	92.32	89.04		23.12	20.86	23.29
20	91.74	86.85		22.8	19.79	22.36
	RPA + Rad51+ Rad52 Y376A				RPA + Rad51+ Rad52 Y376A + Srs2
time (min)	Exp. 1	Exp. 2		Exp. 1	Exp. 2	Exp. 3
0	100	100		100	100	100
2	96.79	98.89		87.21	87.72	86.18
4	96.33	98.42		77.2	77.06	77.3
6	95.78	97.96		68.3	67.95	68.82
8	95.51	97.4		58.48	59.98	61.05
10	95.51	97.77		46.9	51.15	51.06
12	95.33	97.77		32.62	40.79	39.86
14	95.33	98.14		24.47	30.71	30.07
16	95.42	99.63		21.13	24.18	23.71
18	95.14	100.09		20.02	21.69	22.5
20	94.59	100.93		20.11	20.44	21.29
