# Supplementary material for: Rad52-Rad51 association is essential to protect Rad51 filaments against Srs2, but facultative for filament formation
Source: eLife journal article supplement (doi:10.7554/elife.32744), 2018-07-09
Supplement: supp [file elife-32744-supp-v1.zip › elife_poa_e32744_Figure_5_source_data_1.xlsx]

## Sheet: Feuil1
Source data Figure 5															Figure 5B																													Figure 5C
																																												% nicked circular DNA
Figure 5A															Rad52-associated with rad51 filaments (40 mM KCl)																							Median						Biological replicate		1	2	3
		rad51 RPA		RPA Rad51		RPA Rad51 Rad52		RPA Rad51 Rad52-P381S		RPA Rad51 Rad52-Y376A					RPA Rad51 Rad52	15	16	15	23	17	19	15	19	17	19	12	22	19	20	21	23	17	20	17	19			19							Rad51 RPA	35.24	38.3	39.4
Biological replicate		1	2	1	2	1	2	1	2	1	2					21	25	19	19	21	23	21	18	18	16	20	21	20	19	21	17	18	24	17	21										RPA Rad51	12.05	15.9	11.7
complete RPA filaments		153	147	36	40	150	150	126	130	110	104																																		RPA Rad51 Rad52	24.34	33.3	27.9
partial Rad51 filaments		0	0	82	91	0	0	2	2	2	1				RPA Rad51 Rad52-P381S	13	10	14	17	14	12	11	19	13	11	13	14	13	17	14	11	16	16	9	13			13							RPA Rad51 Rad52-P381S	20.78	31.2	24.3
complete Rad51 filaments		0	0	22	26	0	0	22	18	43	40					17	14	15	11	13	15	13	14	16	12	13	9	11	16	12	13	15	11	12	8										RPA Rad51 Rad52-Y376A	13.57	21.1	18.6
	Total	153	147	140	157	150	150	150	150	155	145
															RPA Rad51 Rad52-Y376A	12	14	10	9	12	11	12	11	11	12	14	13	15	14	12	13	11	13	13	12			12
Figure 5D																10	11	14	10	12	10	12	9	14	12	13	12	13	11	13	13	12	8	10	11									Two tailed P values, unpaired T test
		rad51 RPA Srs2		RPA Rad51 Srs2		RPA Rad51 Rad52 Srs2		RPA Rad51 Rad52-P381S Srs2		RPA Rad51 Rad52-Y376A Srs2
																																												T test				p value
Biological replicate		1	2	1	2	1	2	1	2	1	2				Rad52-associated with rad51 filaments (140 mM KCl)																													Rad51 RPA vs RPA Rad51				0.0002
complete RPA filaments		5	5	26	30	92	88	62	58	12	16				RPA Rad51 Rad52	7	6	9	7	10	8	6	7	9	10	7	6	10	8	10	8	7	6	9	9			8						RPA Rad51 vs RPA Rad51 Rad52				0.0064
partial Rad51 filaments		5	7	26	26	0	2	37	37	59	61					9	10	7	8	7	6	8	7	8	7	8	8	7	7	8	10	11	5	8	8	8								RPA Rad51 Rad52 vs RPA Rad51 Rad52-P381S				0.485
complete Rad51 filaments		88	90	48	44	8	10	4	2	25	27																																	RPA Rad51Rad52 vs RPA Rad51 Rad52-Y376A				0.0346
	Total	98	102	100	100	100	100	103	97	96	104				RPA Rad51 Rad52YA	3	3	5	4	4	3	4	0	0	0	1	3	4	5	3	3	2	5	2	4	0		3
																4	3	3	2	5	4	0	0	4	3	3	2	0	1	5	6	6	3	2	4
															Two tailed P values, unpaired T test
															T test				p value
															Rad52 vs rad52-P381S (40 mM KCl)				0.0001
															Rad52 vs rad52-Y376A (140 mM KCl)				0.0001
